# Supplementary material
Source: publisher figshare collection journal article supplement (https://gsajournals.figshare.com/ndownloader/files/13519553)
Supplement: Supplementary file 1 [file 13519553]

## Sheet: HopZ1a
Table S1. Confirmed genetic interactors of HopX1
Effector	Genetic Interaction	Systematic Name	Gene Name
HopX1	Synthetic lethal	YCR009C	RVS161
HopX1	Synthetic lethal	YDR316W	OMS1
HopX1	Synthetic lethal	YDR276C	PMP3
HopX1	Synthetic lethal	YDR388W	RVS167
HopX1	Synthetic lethal	YGR092W	DBF2
HopX1	Synthetic lethal	YGL173C	KEM1
HopX1	Synthetic lethal	YGL168W	HUR1
HopX1	Synthetic lethal	YGL167C	PMR1
HopX1	Synthetic lethal	YGL043W	DST1
HopX1	Synthetic lethal	YHL031C	GOS1
HopX1	Synthetic lethal	YJL204C	RCY1
HopX1	Synthetic lethal	YIL090W	ICE2
HopX1	Synthetic lethal	YIR002C	MPH1
HopX1	Synthetic lethal	YKL137W
HopX1	Synthetic lethal	YLR330W	CHS5
HopX1	Synthetic lethal	YLR200W	YKE2
HopX1	Synthetic lethal	YLR218C
HopX1	Synthetic lethal	YLR370C	ARC18
HopX1	Synthetic lethal	YLR262C	YPT6
HopX1	Synthetic lethal	YLR039C	RIC1
HopX1	Synthetic lethal	YLR038C	COX12
HopX1	Synthetic lethal	YMR063W	RIM9
HopX1	Synthetic lethal	YMR100W	MUB1
HopX1	Synthetic lethal	YMR105C	PGM2
HopX1	Synthetic lethal	YML013C-A
HopX1	Synthetic lethal	YOL004W	SIN3
HopX1	Synthetic lethal	YOR221C	MCT1
HopX1	Synthetic lethal	YOR350C	MNE1
HopX1	Synthetic lethal	YOR275C	RIM20
HopX1	Synthetic lethal	YPR134W	MSS18
HopX1	Synthetic lethal	YBR020W
HopX1	Synthetic lethal	YPR070W	MED1
